# Supplementary material
Source: publisher figshare collection journal article supplement (https://acs.figshare.com/ndownloader/files/5755851)
Supplement: Supplementary file 1 [file 5755851]

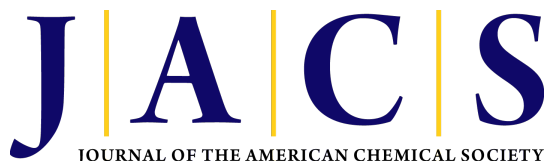

JOURNAL OF THE AMERICAN CHEMICAL SOCIETY

J. Am. Chem. Soc., 1997, 119(34), 8111-8112, DOI:[10.1021/ja9715758](https://doi.org/10.1021/ja9715758)

#### Terms & Conditions

Electronic Supporting Information files are available without a subscription to ACS Web Editions. The American Chemical Society holds a copyright ownership interest in any copyrightable Supporting Information. Files available from the ACS website may be downloaded for personal use only. Users are not otherwise permitted to reproduce, republish, redistribute, or sell any Supporting Information from the ACS website, either in whole or in part, in either machine-readable form or any other form without permission from the American Chemical Society. For permission to reproduce, republish and redistribute this material, requesters must process their own requests via the RightsLink permission system. Information about how to use the RightsLink permission system can be found at <http://pubs.acs.org/page/copyright/permissions.html>

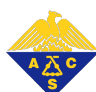

ACS Publications

MOST TRUSTED. MOST CITED. MOST READ.

Copyright © 1997 American Chemical Society

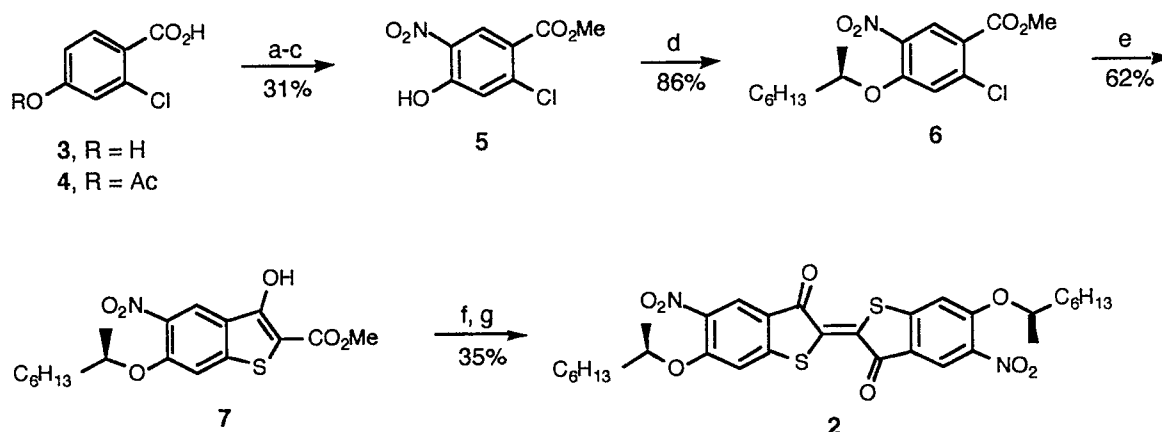

(a)  $\text{Ac}_2\text{O}$ ; (b)  $\text{HNO}_3$ ,  $\text{AcOH}$ ; (c)  $\text{CH}_3\text{OH}$ ,  $\text{H}_2\text{SO}_4$ ; (d) (*S*)-2-octanol, DIAD,  $\text{Ph}_3\text{P}$ ,  $\text{CH}_2\text{Cl}_2$ ; (e)  $\text{HSCH}_2\text{CO}_2\text{Me}$ ,  $\text{LiOH}$ ,  $\text{DMF}$ ,  $25^\circ\text{C}$ ; (f) 15%  $\text{KOH}$ ,  $\text{EtOH}$ ,  $\text{H}_2\text{O}$ ; (g)  $\text{K}_3\text{Fe}(\text{CN})_6$

**General.**  $^1\text{H}$  and  $^{13}\text{C}$  NMR spectra were recorded on a Bruker ACF-200 NMR spectrometer in deuterated chloroform or deuterated acetone. The chemical shifts are reported in  $\delta$  (ppm) relative to tetramethylsilane as internal standard. Low-resolution EI and CI mass spectra were recorded on a Fisons VG Quattro triple quadrupole mass spectrometer; peaks are reported as  $m/e$  (% intensity relative to the base peak). High-resolution EI mass spectra were performed by the University of Ottawa Regional Mass Spectrometry Center. UV-visible spectra were recorded on a Varian Cary 3 spectrophotometer in benzene. Melting points were measured on a Mel-Temp II melting point apparatus and are uncorrected.

**Materials.** All reagents were obtained from commercial sources and used without further purification unless otherwise noted. Dimethylformamide (DMF) was distilled from  $\text{BaO}$  under reduced pressure and stored over molecular sieves. Methylene chloride ( $\text{CH}_2\text{Cl}_2$ ) was distilled from  $\text{P}_2\text{O}_5$  under  $\text{N}_2$ . 2-Chloro-4-hydroxybenzoic acid (**3**) was prepared according to the published procedure (Molnar, I.; Wagner-Jauregg, T. *Helv. Chim. Acta* **1969**, 52, 401), and shown to have the expected physical and spectral properties.

**Methyl 2-chloro-4-hydroxy-5-nitrobenzoate (5).** A solution of **3** (1.55 g, 9.0 mmol) in acetic anhydride (5 mL) was heated on a steam bath for 30 min, then poured over ice and filtered in a Buchner funnel. The solid residue was washed with water and air dried to give 1.76 g of the acetoxy derivative **4**. Without further purification, compound **4** was dissolved in a mixture of 95% HNO<sub>3</sub> (15 mL) and glacial AcOH (15 mL) and stirred at 25 °C for 24 h. The mixture was then concentrated *in vacuo*, and the yellow residue was dissolved in a mixture of MeOH (20 mL) and conc. H<sub>2</sub>SO<sub>4</sub> (0.5 mL) and refluxed overnight. After cooling, the mixture was poured into H<sub>2</sub>O and extracted with ether (2×). The combined extracts were washed with H<sub>2</sub>O, brine, then dried (MgSO<sub>4</sub>) and concentrated. Purification by flash chromatography on silica gel (30% EtOAc/toluene) gave 0.64 g (31%) of **5** as a yellow solid: mp 94-95 °C; <sup>1</sup>H NMR (200 MHz, acetone-*d*<sub>6</sub>) δ 3.91 (s, 3H), 7.36 (s, 1H), 8.64 (s, 1H), 10.8 (s, OH); <sup>13</sup>C NMR (50 MHz, acetone-*d*<sub>6</sub>) δ 52.9, 122.3, 122.9, 130.0, 134.0, 142.3, 157.0, 164.1; MS (EI) *m/e* 233 (M+2, 6), 231 (M+, 18), 202 (35), 200 (100), 170 (5), 156 (15), 154 (38), 142 (8), 126 (13), 113 (6), 97 (12); HRMS (EI) calcd for C<sub>8</sub>H<sub>6</sub>NO<sub>5</sub><sup>37</sup>Cl: 232.9905. Found: 232.9888.

**Methyl (*R*)-2-chloro-4-(1-methylheptyloxy)-5-nitrobenzoate (6).** Under a N<sub>2</sub> atmosphere, diisopropylazodicarboxylate (DIAD, 202 mg, 0.99 mmol) was added dropwise to a stirred solution of **5** (153 mg, 0.66 mmol), Ph<sub>3</sub>P (260 mg, 0.99 mmol) and (*S*)-2-octanol (90 mg, 0.69 mmol) in dry CH<sub>2</sub>Cl<sub>2</sub> (10 mL). After stirring at 25 °C for 2 h, the solvent was removed *in vacuo*, and the oily residue was purified by flash chromatography on silica gel (30% EtOAc/toluene) to give 195 mg (86%) of **6** as a yellow oil: <sup>1</sup>H NMR (200 MHz, CDCl<sub>3</sub>) δ 0.87 (t, *J* = 6.6 Hz, 3H), 1.20-1.80 (m, 10H), 1.38 (d, *J* = 6.0 Hz, 3H), 3.92 (s, 3H), 4.56 (m, *J* = 6.0 Hz, 1H), 7.10 (s, 1H), 8.45 (s, 1H); <sup>13</sup>C NMR (50 MHz, CDCl<sub>3</sub>) δ 14.0, 19.3, 22.5, 25.0, 29.0, 31.6, 36.0, 52.6, 77.6, 117.6, 120.5, 129.5, 138.0, 140.3, 154.0, 163.6; MS (CI) *m/e* 346 (M+3, 32), 344 (M+1, 100), 316 (22), 314 (67), 301 (13), 299 (36), 279 (17), 262 (35), 260 (96), 234 (25), 232 (69), 201 (6), 149 (4), 91 (16); HRMS (EI) calcd for C<sub>15</sub>H<sub>19</sub>NO<sub>4</sub><sup>35</sup>Cl (M–OCH<sub>3</sub>): 312.1001. Found: 312.1004.

**Methyl (*R*)-3-hydroxy-6-(1-methylheptyloxy)-5-nitrobenzo[*b*]thiophene-2-carboxylate**

(7). Under a N<sub>2</sub> atmosphere, a mixture of **6** (197 mg, 0.57 mmol), anhydrous LiOH (48 mg, 2 mmol) and methyl thioglycolate (91 mg, 0.86 mmol) in dry DMF (10 mL) was stirred overnight at 25 °C. The mixture was poured into H<sub>2</sub>O (40 mL), acidified with 3M HCl and extracted with EtOAc (3×). The combined extracts were washed with 1M HCl (2×), brine, dried (MgSO<sub>4</sub>) and concentrated to give a yellow oil. Purification by flash chromatography on silica gel (30% EtOAc/toluene) gave 135 mg (62%) of **7** as a yellow waxy solid: mp 54-55 °C; <sup>1</sup>H NMR (200 MHz, CDCl<sub>3</sub>) δ 0.87 (t, *J* = 6.7 Hz, 3H), 1.24-1.80 (m, 10H), 1.39 (d, *J* = 6.2 Hz, 3H), 3.95 (s, 3H), 4.54 (m, *J* = 6.0 Hz, 1H), 7.26 (s, 1H), 8.31 (s, 1H), 10.1 (s, 1H); <sup>13</sup>C NMR (50 MHz, CDCl<sub>3</sub>) δ 14.0, 19.2, 22.6, 25.2, 29.1, 31.7, 36.1, 52.3, 77.0, 101.5, 107.8, 120.1, 122.3, 140.0, 143.5, 151.7, 159.2, 166.8; MS (CI) *m/e* 382 (*M*+1, 3), 270 (100), 232 (98), 212 (18), 202 (48), 149 (12), 113 (19); HRMS (EI) calcd for C<sub>18</sub>H<sub>23</sub>NO<sub>6</sub>S: 381.1246. Found: 381.1252.

**(*R,R*)-6,6'-Bis(1-methylheptyloxy)-5,5'-dinitrothioindigo (2).** A suspension of **7** (153 mg, 0.36 mmol) in a 15% solution of KOH in 1:1 EtOH/H<sub>2</sub>O (15 mL) was heated to reflux for 5h. After cooling to room temperature, the mixture was treated with 300 mg of K<sub>3</sub>[Fe(CN)<sub>6</sub>] dissolved in H<sub>2</sub>O (2 mL) and stirred for 1 h. After removing the alcohol *in vacuo*, the mixture was extracted with CHCl<sub>3</sub> (2×), and the combined extracts were washed with H<sub>2</sub>O, dried (MgSO<sub>4</sub>) and concentrated to a red solid. Purification by flash chromatography on silica gel (benzene) gave 40 mg (35%) of **7** as a red solid. The compound was further purified for doping experiments by recrystallization from 15% CHCl<sub>3</sub>/hexanes: mp 189-190 °C; <sup>1</sup>H NMR (200 MHz, CDCl<sub>3</sub>) δ 0.88 (t, *J* = 6.6 Hz, 6H), 1.15-1.85 (m, 20H), 1.44 (d, *J* = 6.1 Hz, 6H), 4.66 (m, *J* = 6.0 Hz, 2H), 7.12 (s, 2H), 8.37 (s, 2H); <sup>13</sup>C NMR (50 MHz, CDCl<sub>3</sub>) δ 14.0, 19.3, 22.5, 25.1, 29.0, 31.6, 36.0, 78.1, 109.0, 120.3, 124.4, 133.1, 139.6, 154.6, 157.6, 186.8; MS (EI) *m/e* 642 (*M*<sup>+</sup>, 1), 418 (100), 388 (4), 372 (5), 359 (2), 326 (2), 253 (2), 208 (4), 165 (16), 111 (26), 83 (59); HRMS (EI) calcd for C<sub>32</sub>H<sub>38</sub>N<sub>2</sub>O<sub>8</sub>S<sub>2</sub>: 642.2070. Found: 642.2044.
